# Supplementary material
Source: MDPI journal article supplement (https://www.mdpi.com/2076-3417/13/4/2433)
Supplement: s1 [file s1]

## Supplementary Information File

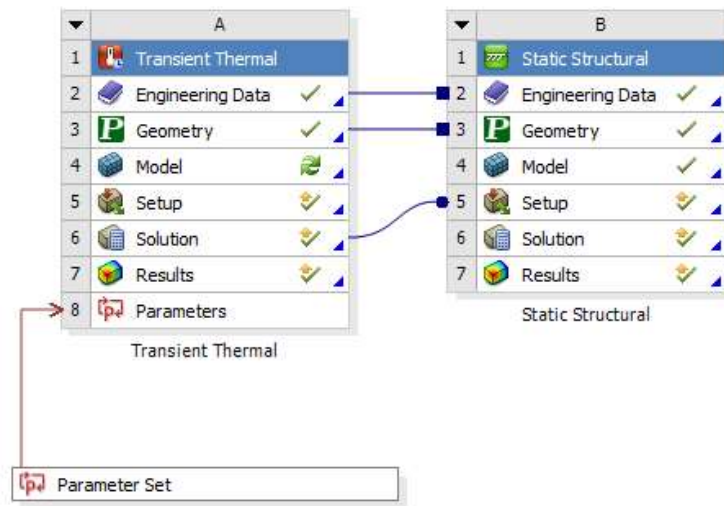

Fig. S1 Coupling Thermal Transient Analysis (FEA\_A) with Static Structural Analysis (FEA\_B)

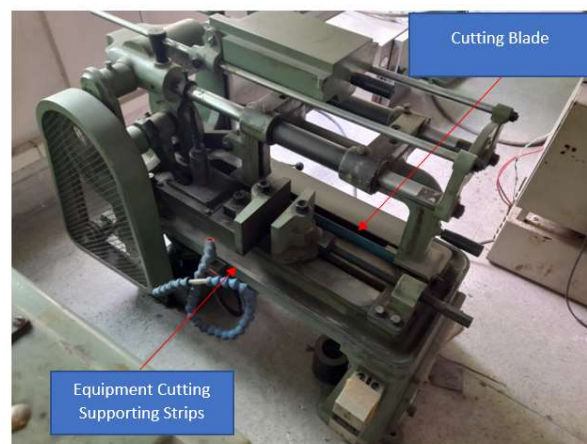

Fig. S2 Electric Saw Equipment for cutting sides of testing strips

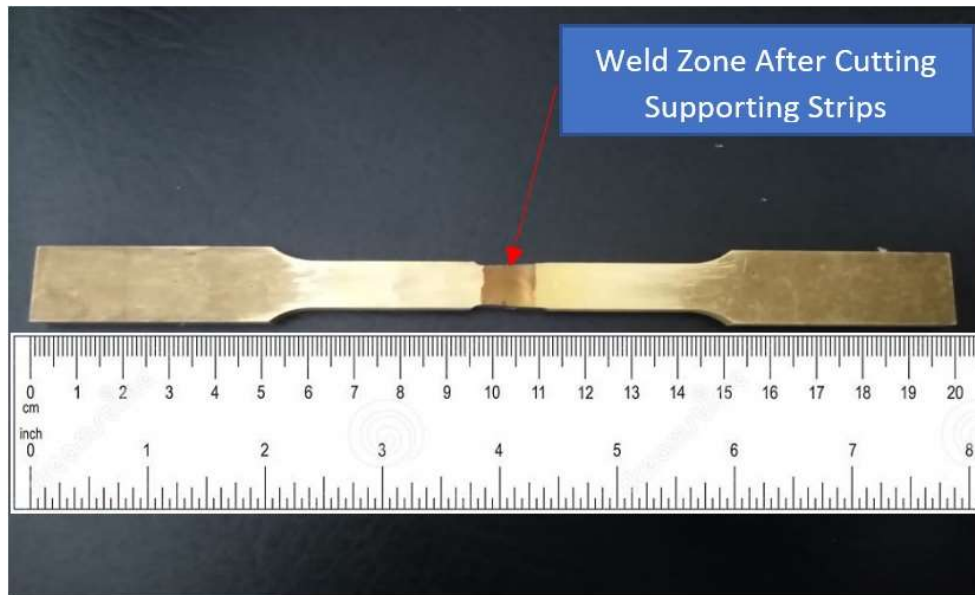

Fig. S3 A sample Cut by Electric Saw Equipment

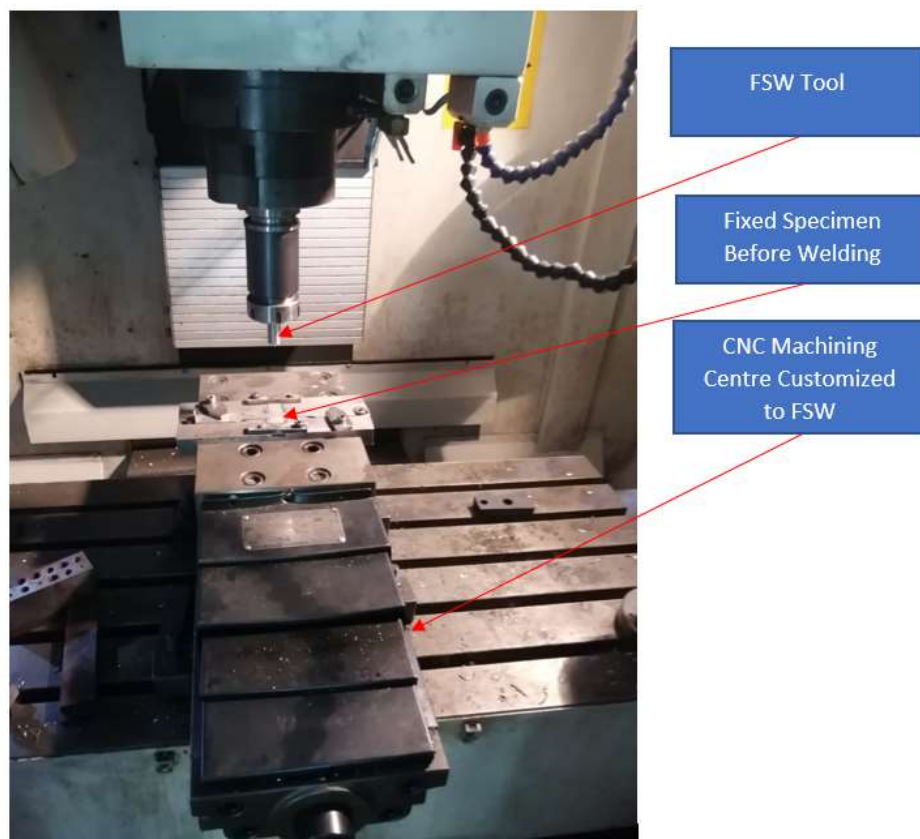

Fig. S4 Customized FSW using CNC Machining Centre

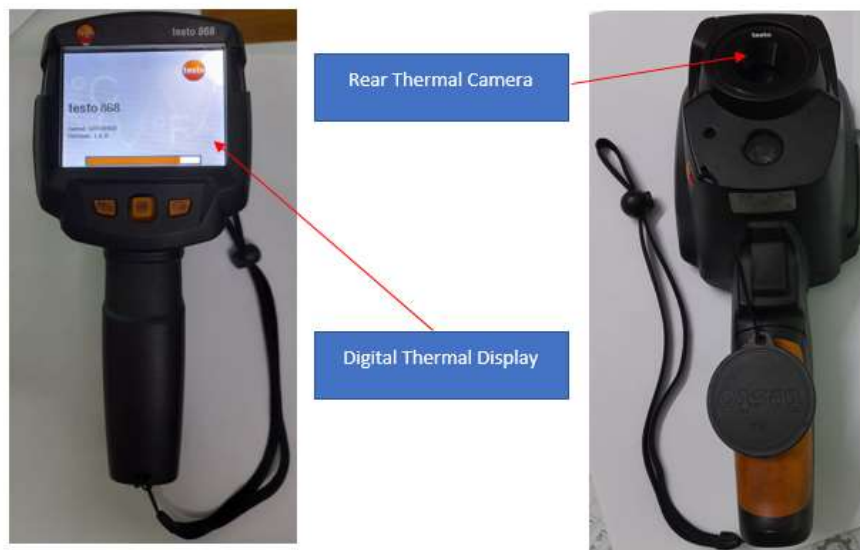

Fig. S5 Thermal Imager

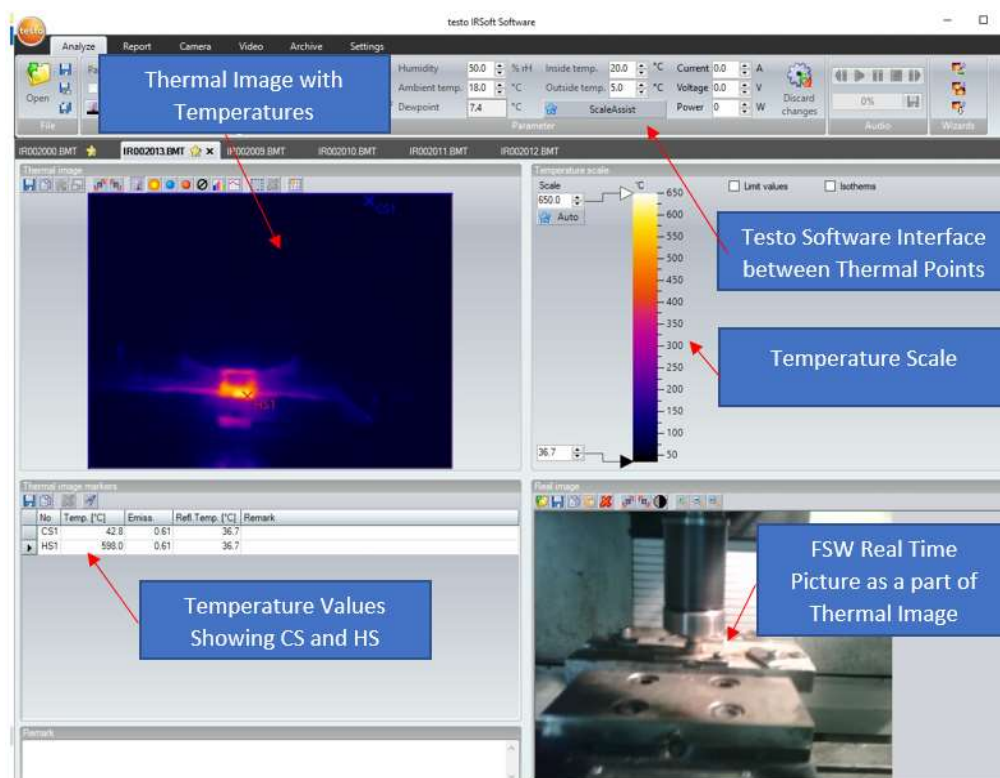

Fig. S6 An example of Thermal Image from Testo 868 Imager

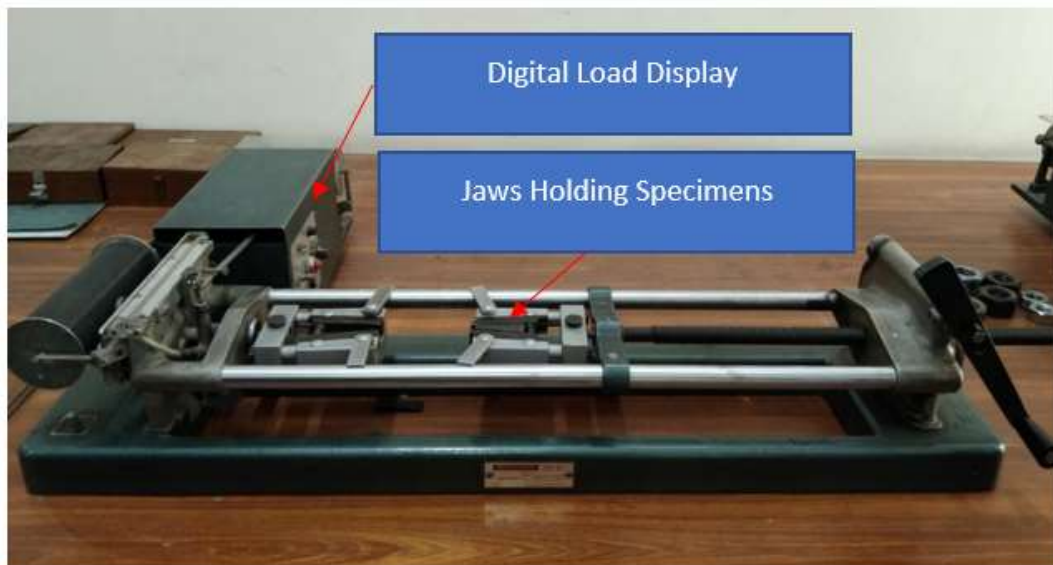

Fig. S7 Hounsfield Tensometer for measuring Friction Stir Weld Strength (FSWS)

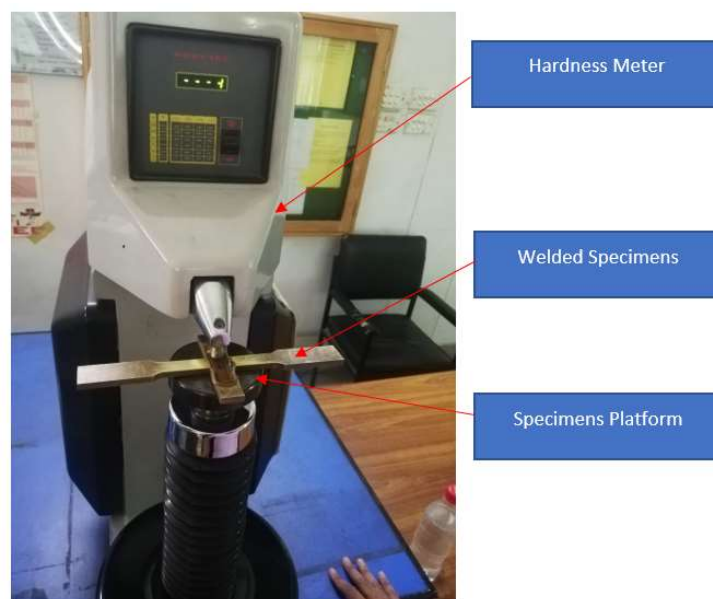

Fig. S8 Rockwell Hardness Tester
